# Supplementary material for: Nitrogen-containing organic aerosols and highly oxidized molecules produced by reaction of ozone with floor cleaning detergent
Source: Royal Society of Chemistry journal article supplement (doi:10.1039/d4ea00076e), 2024-01-01
Supplement: d4ea00076e1.pdf [file d4ea00076e1.pdf]

1  
2  
3  
4  
5  
6  
7  
8  
9  
10  
11  
12  
13  
14  
15  
16  
17  
18  
19  
20  
21  
22  
23  
24  
25  
26  
27  
28

## Supplementary Information

### Nitrogen-Containing Organic Aerosols and Highly Oxidized Molecules Produced by Reaction of Ozone with Floor Cleaning Detergent

Jinli Xu<sup>1,2,3,4#</sup>, Tianle Pan<sup>1,2,3,4#</sup>, Tingting Feng<sup>1,2,3,4</sup>, Yingkun Wang<sup>1,2,3,4</sup>, Wei Chen<sup>1,2,3,4</sup>,  
Weiwei Hu<sup>1,2,3\*</sup>, Sasho Gligorovski<sup>1,2,3\*</sup>

<sup>1</sup>State Key Laboratory of Organic Geochemistry and Guangdong Provincial Key  
Laboratory of Environmental Protection and Resources Utilization, Guangzhou Institute  
of Geochemistry, Chinese Academy of Sciences, Guangzhou 510 640, China  
<sup>2</sup>Guangdong-Hong Kong-Macao Joint Laboratory for Environmental Pollution and  
Control, Guangzhou Institute of Geochemistry, Chinese Academy of Science, Guangzhou  
510640, China  
<sup>3</sup>Chinese Academy of Science, Center for Excellence in Deep Earth Science, Guangzhou  
510640, China  
<sup>4</sup>University of Chinese Academy of Sciences, Beijing 101408, China

\*Corresponding authors

Weiwei Hu ([weiwei.hu@gig.ac.cn](mailto:weiwei.hu@gig.ac.cn))

Sasho Gligorovski ([gligorovski@gig.ac.cn](mailto:gligorovski@gig.ac.cn))

#The first two authors contribute equally

**This file contains six supplementary texts, nine figures, and two tables.**

### 29 **Test S1: Cleaning Procedure**

30 The chamber was prepared by rinsing eight times with tap water followed by successive  
31 immersions into a bath of hydrochloric acid (HCl) 10%, sodium hydroxide (NaOH) 1M for  
32 1h and further rinsing eight times in deionized water sequentially. Finally, it is wrapped in  
33 aluminum foil and baked in a 40°C oven to remove any residual moisture.

### 34 **Test S2: Samples Preparation**

35 The detergent used in this study is manufactured by large international company and  
36 readily available for purchase online and in most supermarkets in China and elsewhere.  
37 The active ingredients of the floor cleaner can be found on the company's website (water,  
38 ethoxylated alcohol, n-alkyl dimethyl benzyl ammonium chlorides,  
39 methylchloroisothiazolinone & methylisothiazolinone and colorant). However, the  
40 volatilities of these substances at room temperature are extremely low and mainly  
41 concentrate in liquid phase. In our previous research, we utilized TD-GC-MS to measure  
42 the volatile components of this floor cleaner. It was found that floor cleaners emit a large  
43 amount of C7~C10 VOCs, including compounds such as d-Limonene, dihydromyrcenol,  
44  $\alpha$ -terpineol,  $\gamma$ -terpineol, and decanal, among the others <sup>1</sup> These compounds are more likely  
45 to react with ozone, leading to the formation of particulate matter. Furthermore, the usage  
46 (dilution ratio) has not been marked out. Therefore, we diluted 1 part of detergent with 4  
47 parts of ultrapure water (18 Mohm, H<sub>2</sub>O-MM-UV-T, Germany) and injected 30ml of the  
48 diluted solution into the reactor through the upper exit.

49

### 50 **Text S3: Experimental Process**

51 The real-time measurements of the particle-phase composition were performed by the

52 EESI-TOF with 5s time resolution, and a SMPS was used to monitor the particle number  
53 size distribution and absolute mass concentration within 14-670 nm. At the beginning of  
54 each experiment, we first test the signal of tank zero air for 16 minutes, then shift the  
55 airflow through a three-ball valve to made it passed through the chamber. Twenty minutes  
56 later, the ozone generator was switched on and the ozone concentration increased to about  
57 50 ppb. The ozonolysis-only experiment lasted about 2.5 hours, followed by an hour-long  
58 photooxidation reaction and a fifty minutes long light irradiation in the absence of ozone.

#### 59 **Text S4: Data Analysis**

60 The elemental composition of these formulas was constrained as  $C_{1-50}H_{0-100}O_{0-50}N_{0-5}$  and  
61  $m/z$  tolerance was 3 ppm for ESI+ mode. To describe the chemical characteristics of the  
62 organic constituents of the generated particles in indoor air, several metrics including  
63 double bond equivalent (DBE), aromaticity equivalent ( $X_c$ ), carbon oxidation state (OSc)  
64 and Kendrick mass defect (KMD) were applied. DBE represents the number of double  
65 bonds and rings in a molecule and was used to assess the degree of unsaturation. DBE can  
66 be expressed as follows:

$$67 \quad DBE = 1 + C + \frac{N - H}{2} \quad (Eq-S1)$$

68 where C, H, and N represent carbon, hydrogen and nitrogen atom numbers in the compound  
69 formula. Since DBE may not accurately identify the level of unsaturation for certain  
70 compounds, the aromaticity equivalent ( $X_c$ ) was also calculated based on Eq-S2:

$$71 \quad X_c = \frac{2C + N - H - 2mO}{DBE - mO} + 1 \quad (Eq-S2)$$

72 where O represents the number of oxygen atoms; m and n represent the fraction of  
73 oxygen/sulfur involved in the  $\pi$  bond structure of the compound formula. If  $[DBE - mO] \leq$

74 0,  $X_C=0$ . Besides, compounds with DBE=0 should not be included in the  $X_C$  scale.<sup>2</sup> In this  
75 study,  $m=0$  was used for the compounds with only hydroxyl, ether and peroxide group;  
76  $m=1$  was used for compounds with only carbonyl, isocyanate and amide group;  $m = 0.5$   
77 was used for all the other compounds. Since the identified compounds did not include S,  
78 the  $n$  parameter was not applied. Use of  $X_C$  value may help to improve the identification  
79 of aromatic compounds in the indoor air particles. Here the threshold values for  $X_C$  as  
80  $X_C=0$ ,  $0 < X_C < 2.50$ ,  $2.5 \leq X_C < 2.7143$ , and  $X_C \geq 2.7143$  were used as minimum criteria for  
81 the presence of aliphatic saturated compounds, aliphatic unsaturated compounds,  
82 monocyclic, and polycyclic aromatic compounds, respectively<sup>2, 4, 52, 4, 5</sup>.

83 The carbon oxidation state ( $OS_C$ ) was also used as another metric to describe the degree of  
84 oxidation of organic species.  $OS_C$  was defined as the charge a carbon atom would take if it  
85 was to lose all electrons in bonds with more electronegative atoms, but gain all electrons  
86 in bonds with less electronegative atoms.<sup>6</sup> For a certain compound  $OS_C$  can be obtained  
87 as follows:

$$OS_C = - \sum_i OS_i \frac{n_i}{n_C} \quad (\text{Eq-S3})$$

88  
89 where  $OS_i$  is the oxidation state associated with element  $i$ , and  $n_i/n_C$  is the molar ratio of  
90 element  $i$  to carbon.<sup>7</sup> In this context, we presume that all oxygen atoms possess an oxidation  
91 state of -2 (excluding peroxides), and organic nitrogen is either in the nitrooxy group form  
92 (with an oxidation state of +5) when there are at least three oxygen atoms, or in the form  
93 of amines (with an oxidation state of -3) when there are fewer than three oxygen atoms.<sup>8</sup>

#### 94 **Text S5: Relative Number Abundances Analysis**

95 Figure S5 shows the relative abundance of the compounds produced under different

96 conditions. The attributed elemental formulas are classified into four  $X_c$  categories. For  
97 the CHO compounds produced from ozone reaction, 37.4% belongs to the group  
98  $X_c \geq 2.7143$ , followed by 27.0% belongs to the group  $2.5 \leq X_c < 2.7143$ , 21.1% belongs to  
99 unsaturated non-aromatic compounds that do not contain C=C or C-C triple bonds  
100 (DBE=0), 7.7 % belongs to  $0 < X_c < 2.5$  and 7.37% belongs to group  $X_c = 0$ . According to the  
101 estimated  $X_c$  values, the detected CHO species are mainly composed of polycyclic  
102 aromatic compounds, followed by monocyclic compounds. The pie chart of the detected  
103 CHNO compounds is entirely different from the one of CHO compounds (Figure S5).  
104 Regarding the CHNO product compounds, the highest percentage (53.0%) of the detected  
105 species is associated with polyaromatic compounds ( $X_c \geq 2.7143$ ), followed by aliphatic  
106 saturated compounds (DBE=0, 22.4%) and aliphatic unsaturated compounds ( $0 < X_c < 2.5$ ,  
107 21.0%), the monoaromatic compounds with a benzene core structure ( $2.5 \leq X_c < 2.7143$ )  
108 exhibits the lowest concentration (0.95%).<sup>3</sup> The distribution of species produced by  
109 photooxidation reaction is the same as that of dark reaction, but the proportions are slightly  
110 different.

#### 111 **Text S6: Estimation of Saturation Concentrations**

112 An element-based method with parameterizations by EESI-ToF measurement was used to  
113 estimate the saturation concentrations ( $C^*$ ) ( $\mu\text{g m}^{-3}$ ) of the detected compounds.<sup>9</sup> Here we  
114 classified the volatilities of compounds into four categories including extremely low  
115 volatility organic compounds (ELVOC,  $\log C^* \leq -3.5$ ), low volatility organic compounds  
116 (LVOC,  $-3.5 < \log C^* \leq -0.5$ ), semi-volatile organic compounds (SVOC,  $-0.5 < \log C^* \leq 2.5$ ),  
117 and intermediate volatility organic compounds (IVOC,  $2.5 < \log C^* \leq 6.5$ ).<sup>10, 11</sup>  
118 Note the average values of the parameterization method of Li et al. (2016) and Daumit et

119 al. (2013) were applied here.<sup>9, 12</sup> The volatility shall be overestimated compared to the  
 120 heating method according to Chen et al. (2024).<sup>13</sup> These low-volatility compounds are  
 121 produced by the gas-phase oxidation of reactive organic compounds, which is initiated by  
 122 the generation of organic radicals and followed by multiple additions of O<sub>2</sub> and  
 123 isomerization.<sup>14</sup>  
 124

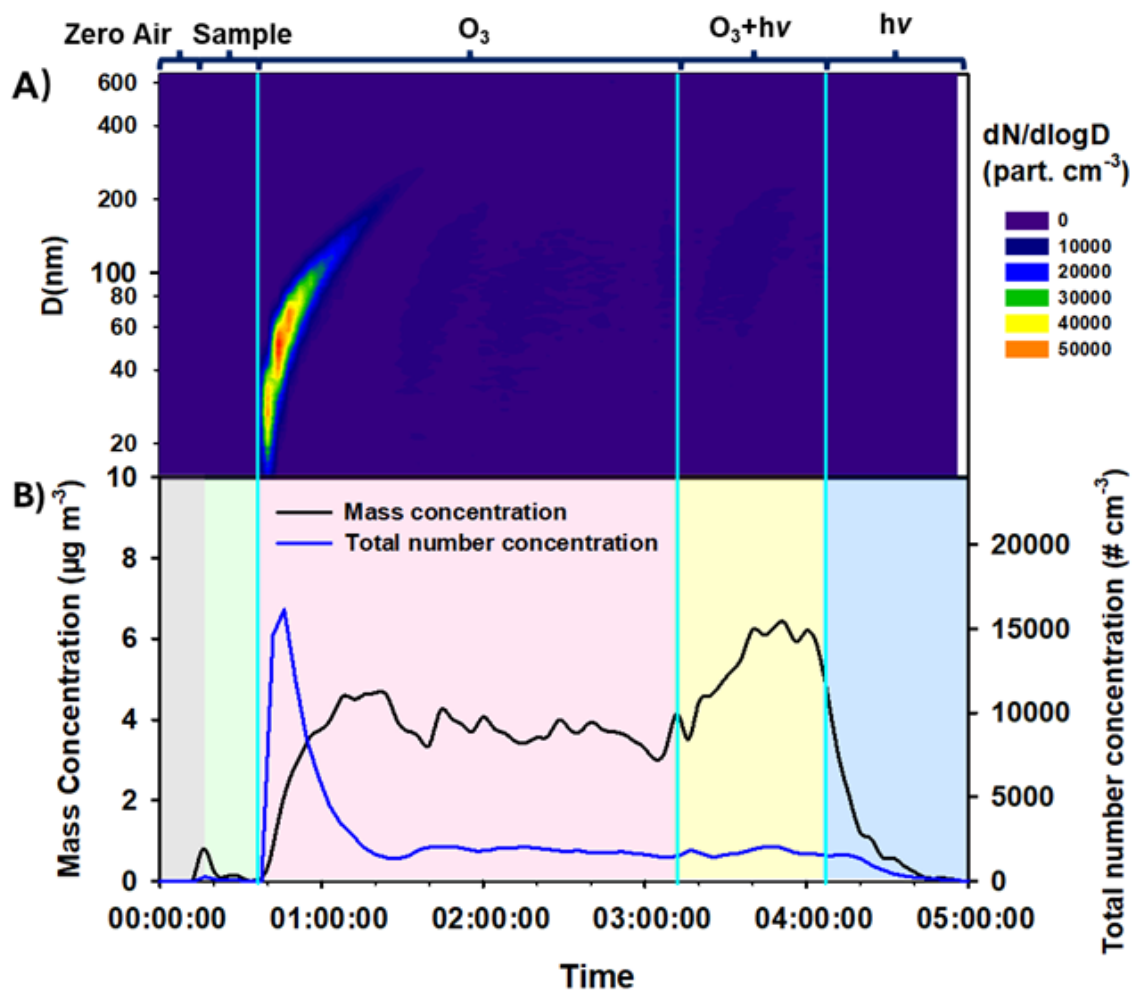

125

126 **Fig. S1** A) Contours plots reporting particle number distribution evolutions measured  
 127 through the O<sub>3</sub> reaction at 70%RH in dark and under light irradiation. B). Time profile of  
 128 the mass concentration and total number concentration. For the conversion of size  
 129 distributions to mass, an effective density of 1.4 g cm<sup>-3</sup> was assumed. The light blue  
 130 vertical lines in the figure delineate different experimental phases, which are the ozone  
 131 oxidation phase (O<sub>3</sub>, pink), the photo-oxidation phase (O<sub>3</sub>+h $\nu$ , yellow), and the

132 photoreaction phase (hv, blue). The corresponding experimental phases are marked at the  
133 top of the figure.

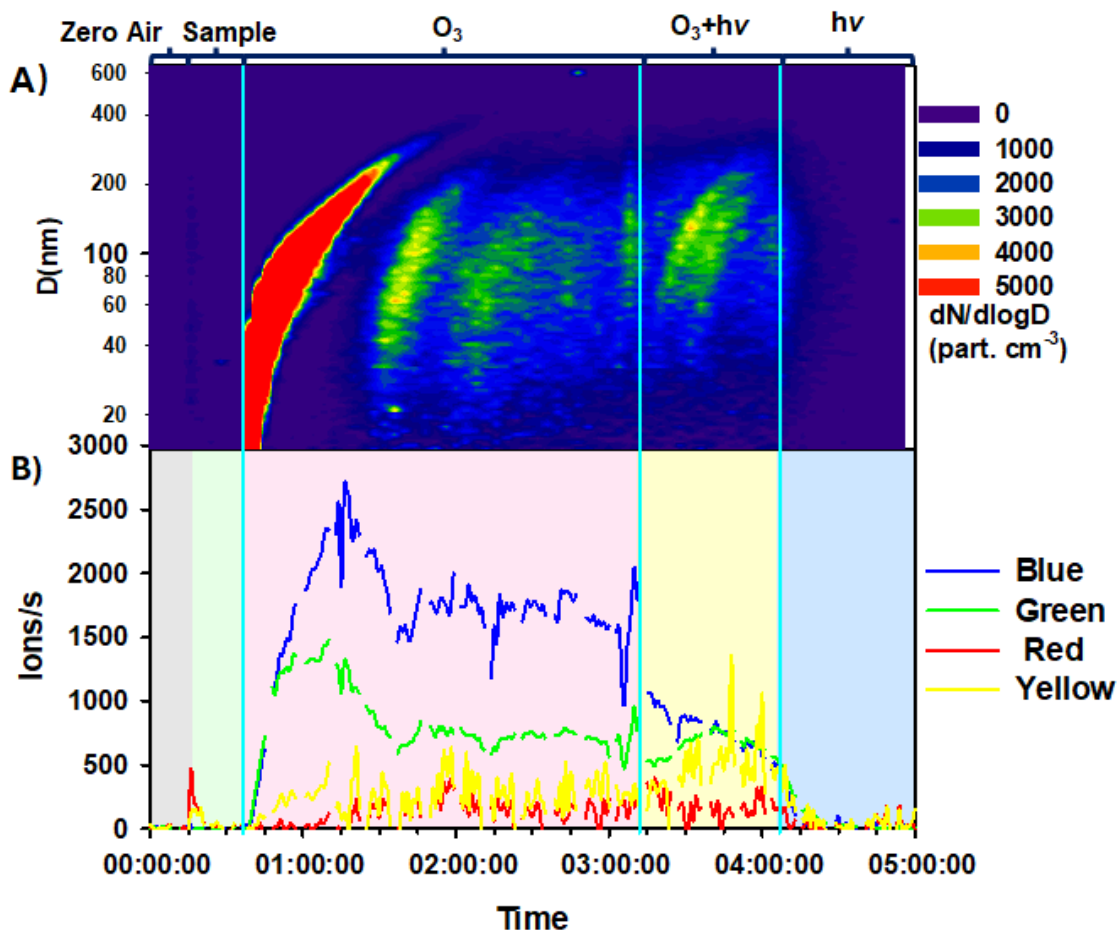

134  
135 **Fig. S2** Co-evolution diagram of particle formation and evolution patterns. A) Contour  
136 plots illustrate the progression of particle number distributions, as determined by ozone-  
137 induced reactions at 70% relative humidity in both the dark and light-exposed conditions.  
138 (Comparable to Fig. S1A yet featuring distinct concentration gradient labels for clarity.)  
139 B) Temporal profiles depicting the fluctuating intensities of various clusters, derived from  
140 a hierarchical cluster analysis approach.

141

142

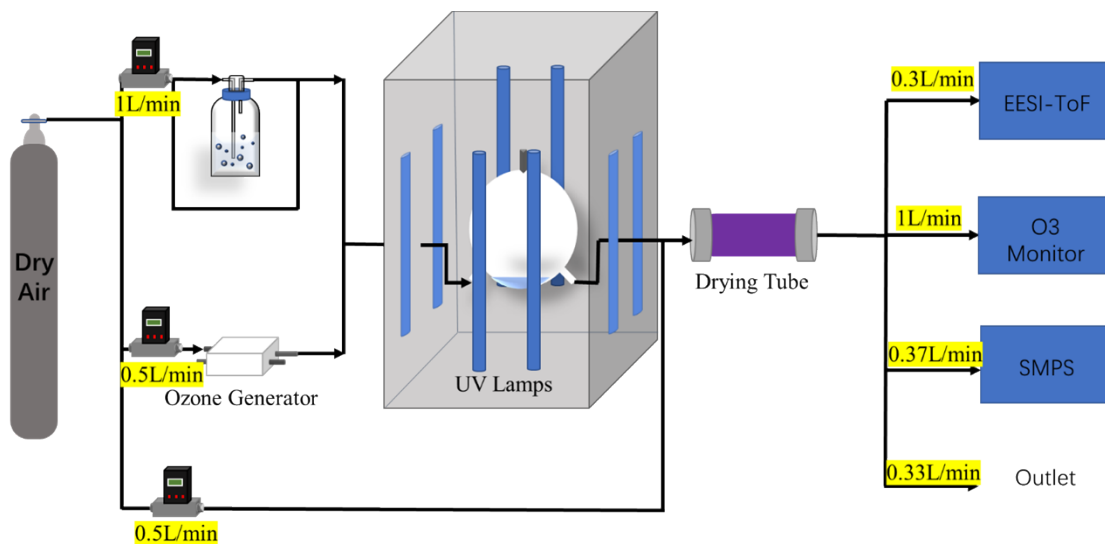

143

144 **Fig. S3** Experimental setup.

145

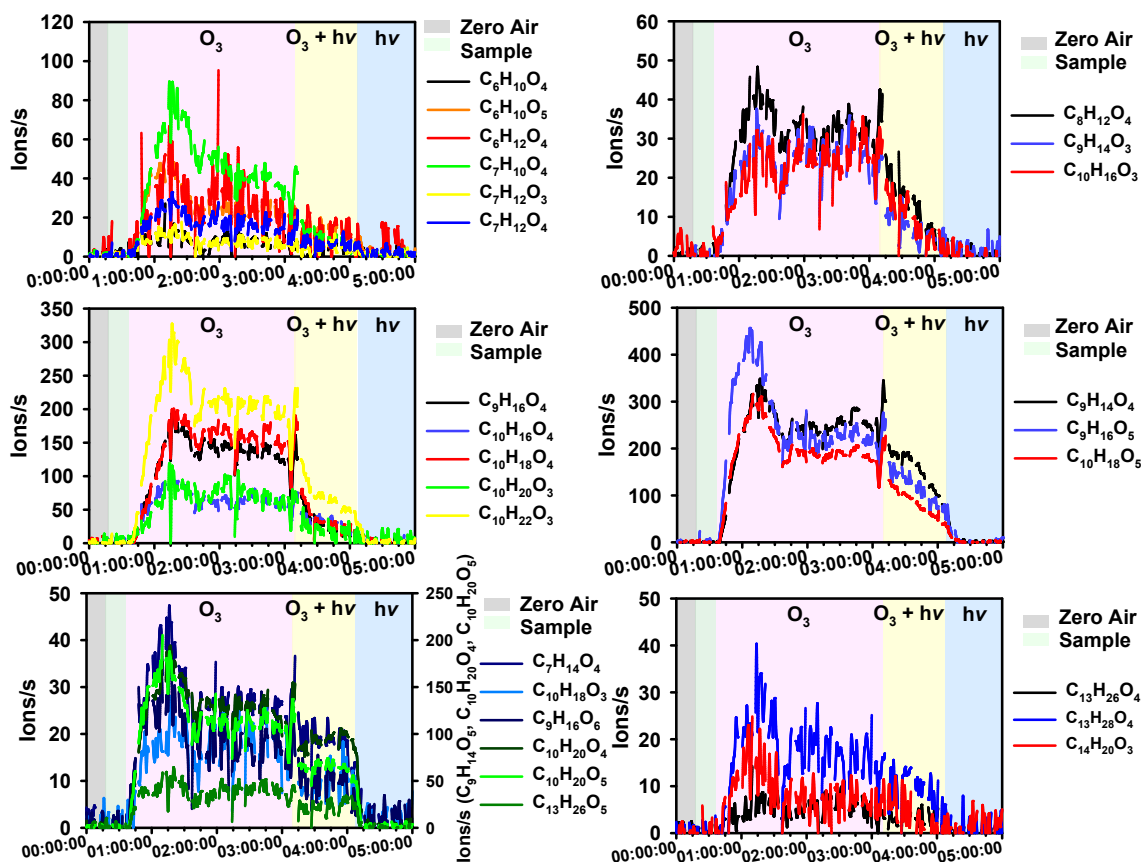

146

147 **Fig. S4** Time profile of different species in each subgroup of group 'Blue'. These  
 148 subgroups show different trends of decreasing, indicating that substances in the same  
 149 subgroup have similar properties, particularly under the light irradiation.

150



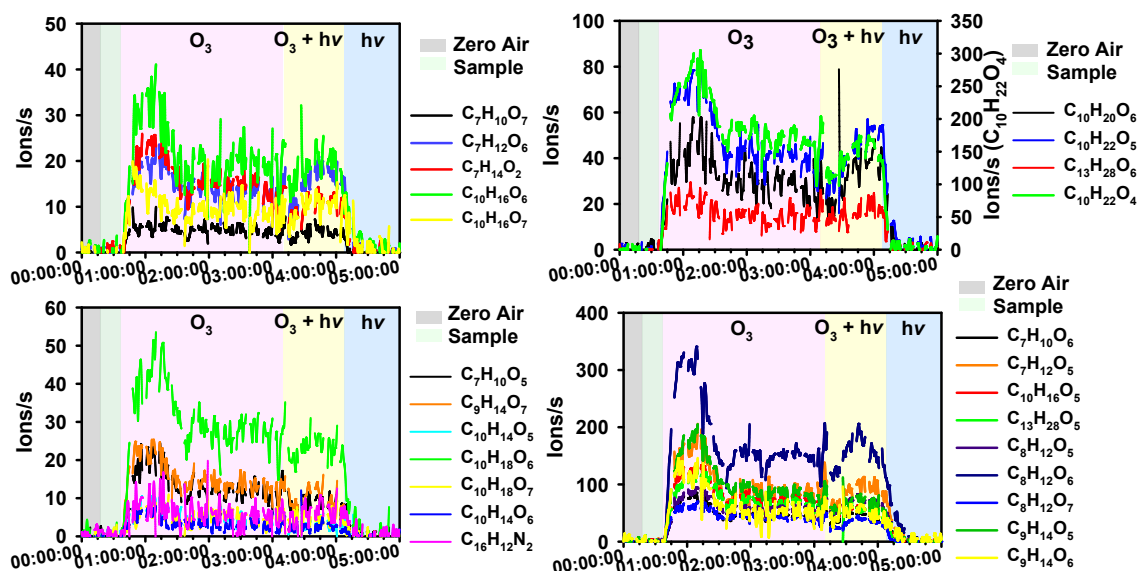

151

152 **Fig. S5** Time profile of different species in each subgroup of group ‘Green’. These  
 153 subgroups show different trends of decreasing, indicating that substances in the same  
 154 subgroup have similar properties, particularly under the light irradiation.

155

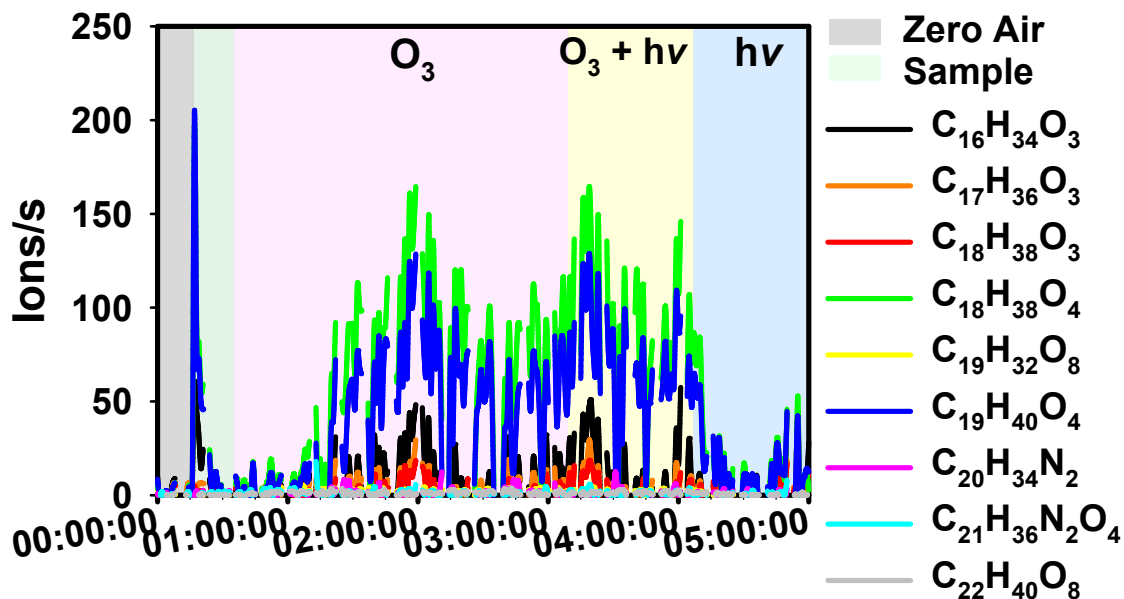

156

157 **Fig. S6** Time profile of different species in the ‘Red’ group. Species with similar intensity-  
 158 time profiles may possess similar properties.

159

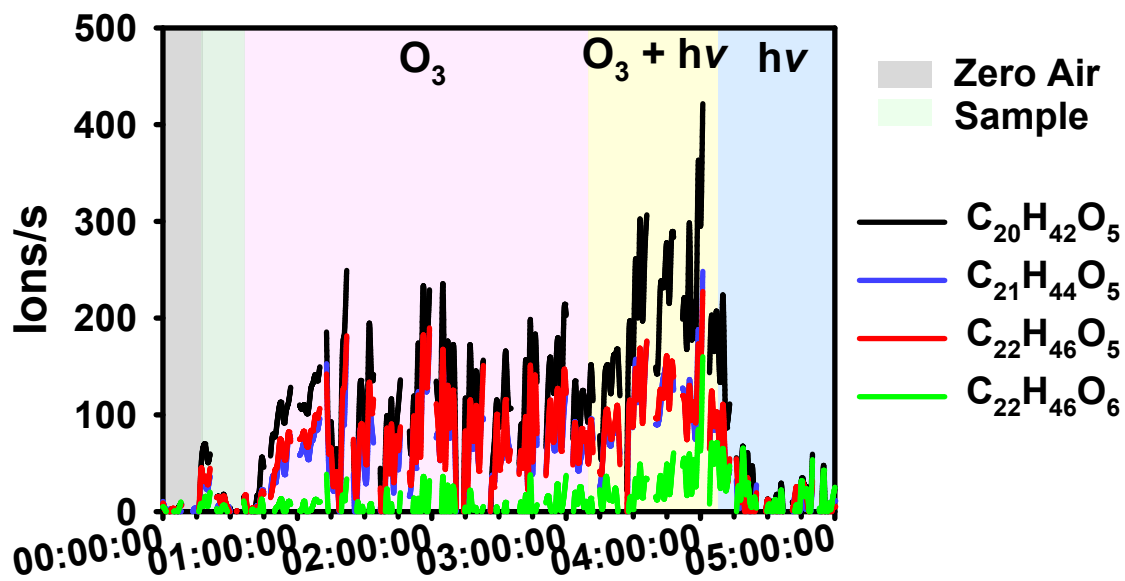

160

161 **Fig. S7** Time profile of different species in the 'Yellow' group. Species with similar  
 162 intensity-time profiles may possess similar properties.

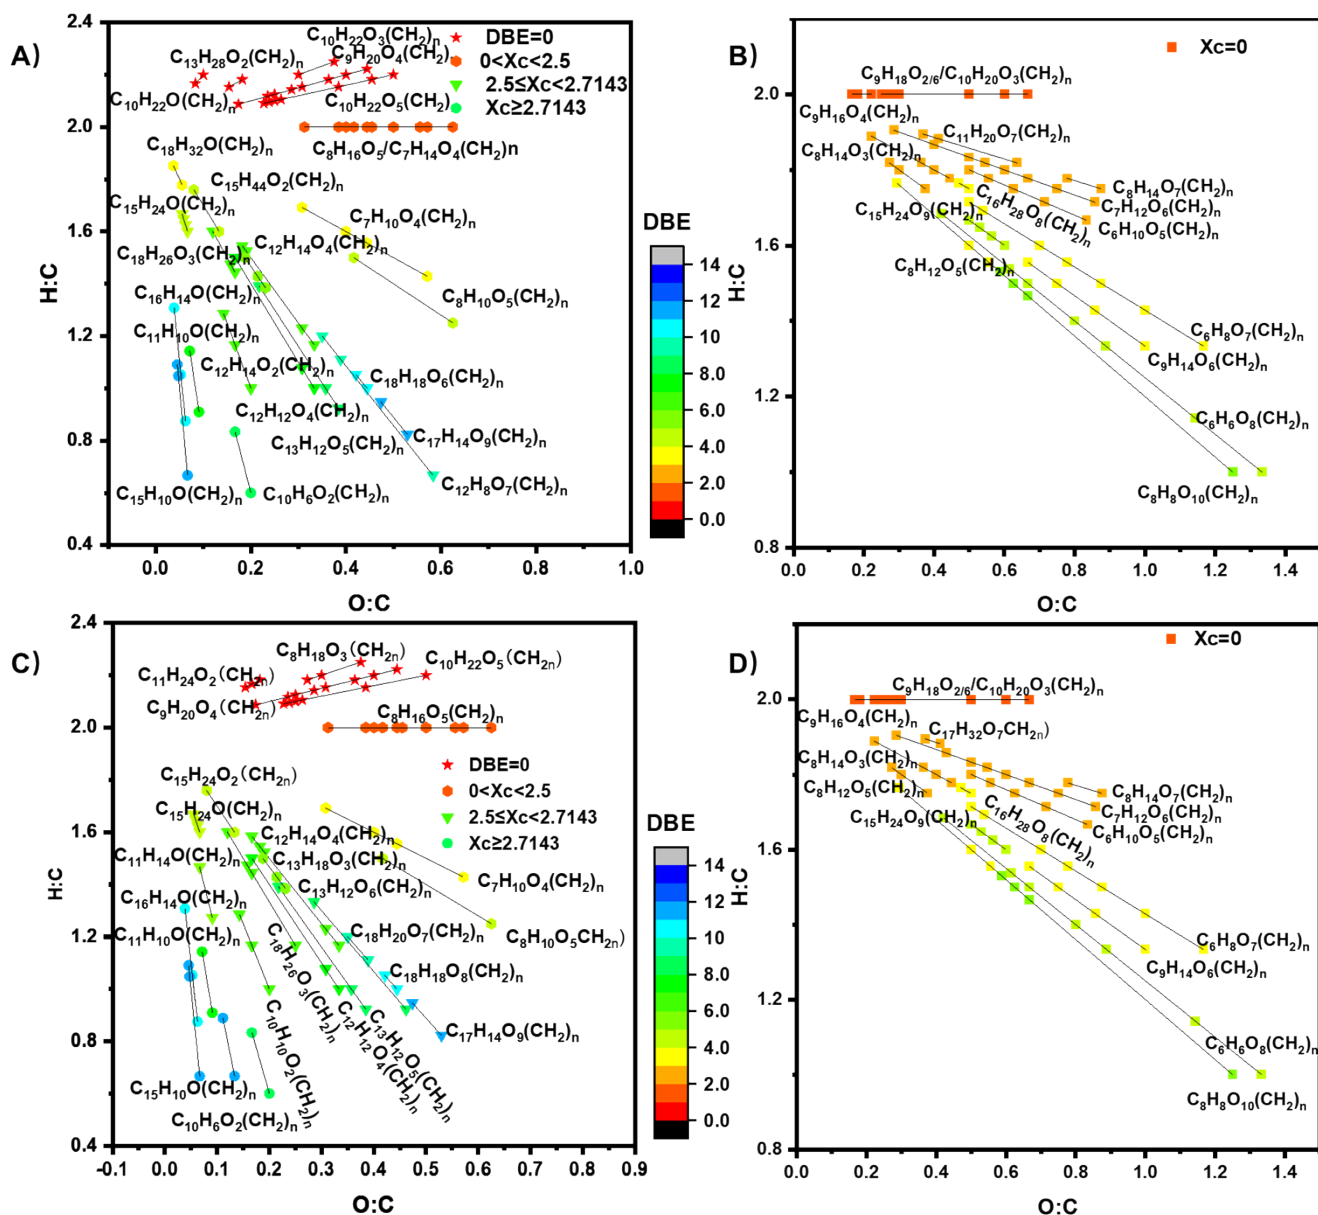

163

164 **Fig. S8** Van Krevelen plot for homologous series of CHO compounds produced from the  
 165 ozone reaction (A, B) and photooxidation reaction (C, D). The orange and green rectangles  
 166 correspond to aliphatic compounds and low oxidation aromatic compounds, respectively.  
 167 The “n” refers to the number of CH<sub>2</sub> groups in a given family.

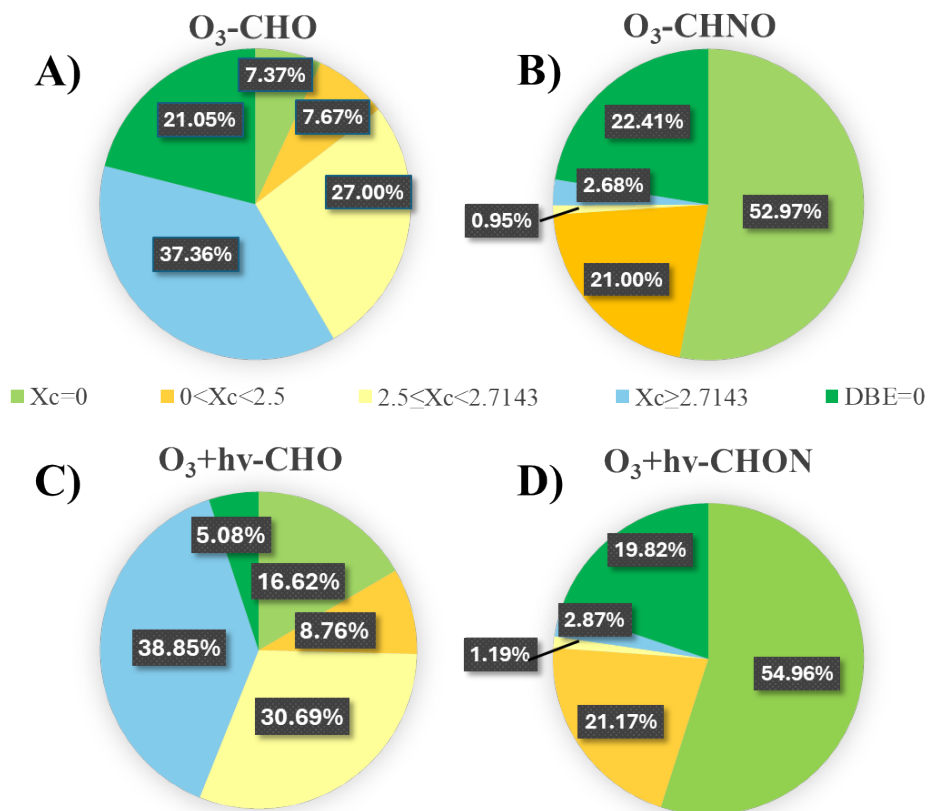

169

170

171 **Fig. S9** Pie chart describing the proportion of different Xc groups under different  
 172 conditions. A) CHO, and B) CHON compounds produced by ozone reaction with the floor  
 173 cleaning detergent, C) CHO and D) CHON compounds produced under photooxidation  
 174 reaction with the cleaning detergent.

175

176

177

178

179

180

181

182

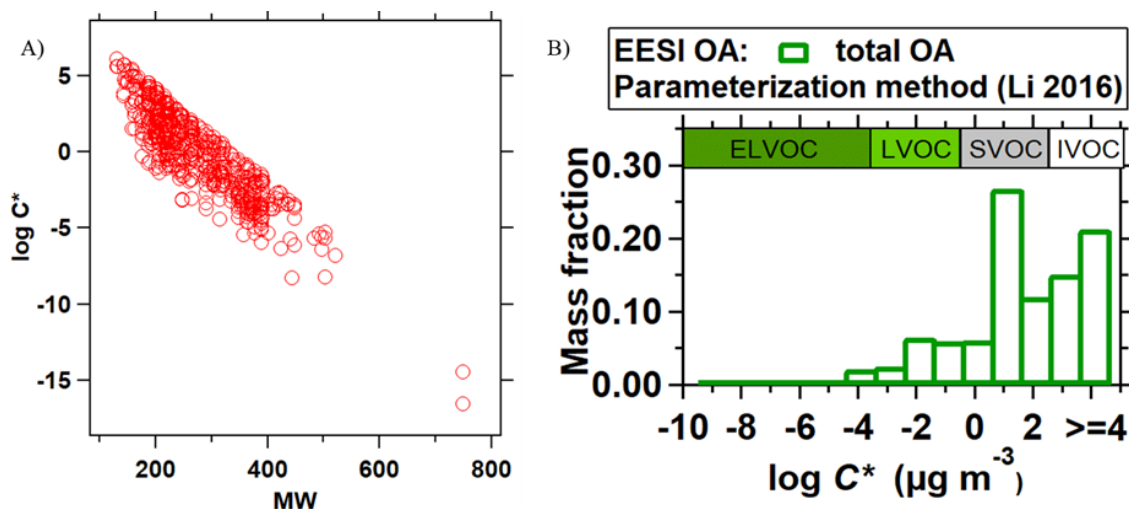

183  
 184  
 185  
 186  
 187  
 188  
 189  
 190  
 191  
 192  
 193  
 194  
 195

**Fig. S10** A) Variation trend of estimated volatility vs. molecular weight. B) Estimated volatility distributions for identified compounds based on the element-based methods with parameterizations by EESI-ToF measurements.

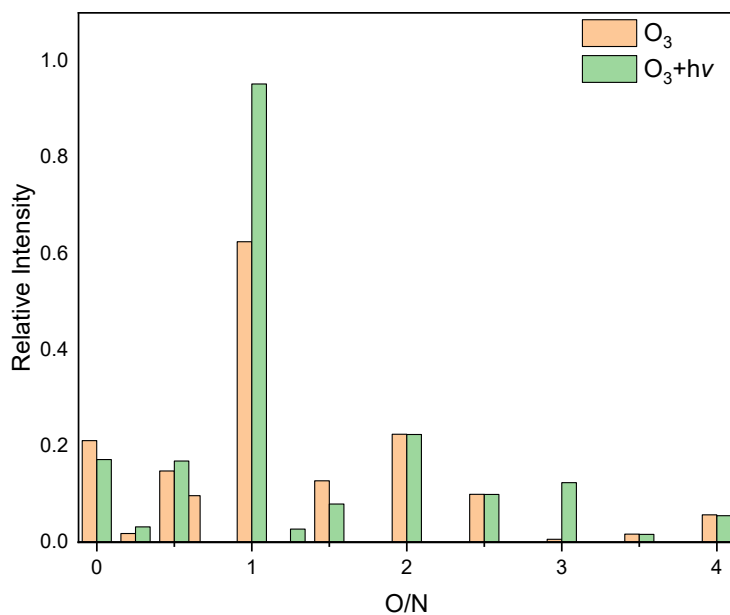

196

**Fig. S11** Nitrogen containing organics separated into subgroups according to the O/N ratio in their chemical structures.

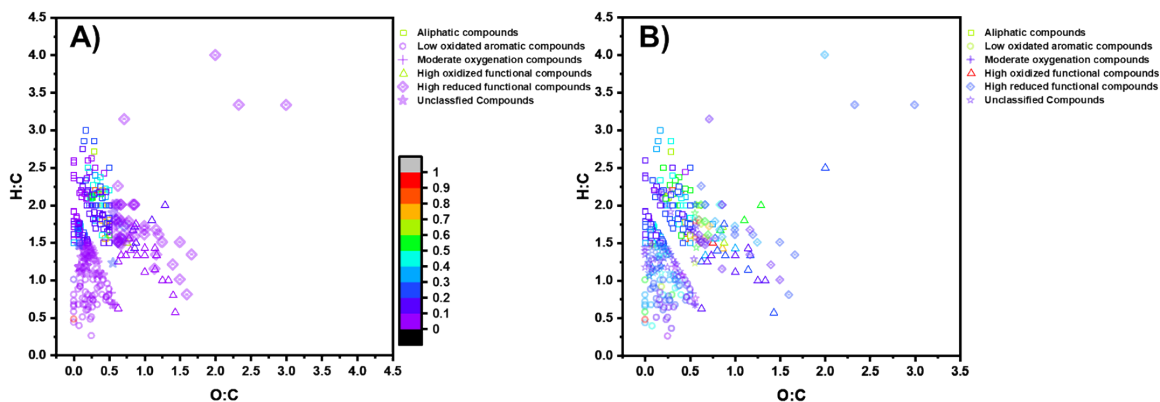

199

200 **Fig. S12** Classification of the chosen substances based on their H/C, O/C, and OSc ratios  
 201 under different conditions: A) Oxidation reaction, B) Photo-oxidation reaction. In the  
 202 figure, square boxes depict aliphatic compounds, open circles denote lightly oxygenated  
 203 aromatic compounds, crosses signify moderately oxygenated compounds, hollow triangles  
 204 represent highly oxidized functional compounds, dotted diamonds stand for highly reduced  
 205 functional compounds, and hollow five-pointed stars indicate unclassified compounds. The  
 206 color gradient corresponds to the fourth root of the relative signal strength.  
 207

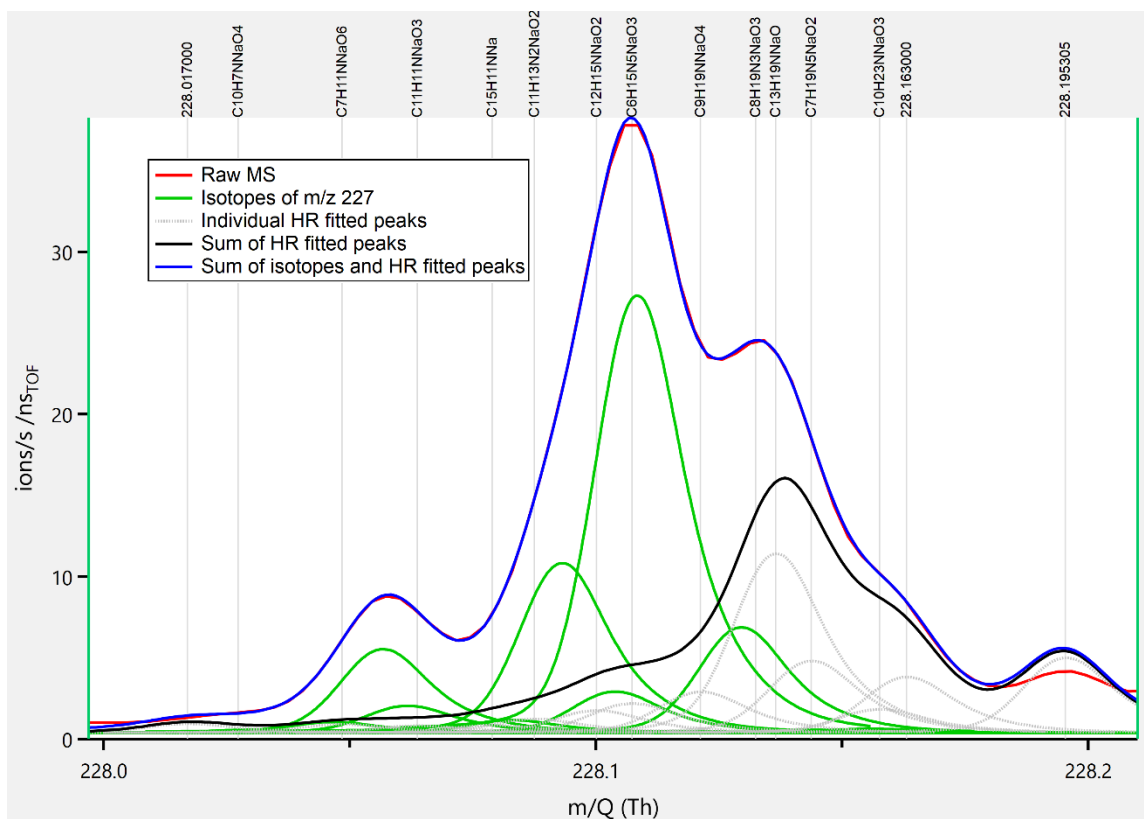

208

209 **Fig. S13** A mass spectrum of the  $m/z$  228. Both the isotope peaks of  $m/z$  227 and the HR  
 210 fitted peaks of  $m/z$  228 are included.

211 **Table S1.** Four groups of compounds divided by the hierarchical cluster analysis. The  
 212 molecular weight noted here does not include the molecular weight of Na<sup>+</sup>.

|                                                | Formula                                          | Molecular Weight |                                                | Formula                                        | Molecular Weight                               |        |
|------------------------------------------------|--------------------------------------------------|------------------|------------------------------------------------|------------------------------------------------|------------------------------------------------|--------|
| <b>Blue</b>                                    | C <sub>6</sub> H <sub>10</sub> O <sub>4</sub>    | 146.14           | <b>Green</b>                                   | C <sub>7</sub> H <sub>10</sub> O <sub>7</sub>  | 206.15                                         |        |
|                                                | C <sub>6</sub> H <sub>10</sub> O <sub>5</sub>    | 162.14           |                                                | C <sub>7</sub> H <sub>12</sub> O <sub>6</sub>  | 192.17                                         |        |
|                                                | C <sub>6</sub> H <sub>12</sub> O <sub>4</sub>    | 148.16           |                                                | C <sub>7</sub> H <sub>14</sub> O <sub>2</sub>  | 130.18                                         |        |
|                                                | C <sub>7</sub> H <sub>10</sub> O <sub>4</sub>    | 158.15           |                                                | C <sub>10</sub> H <sub>16</sub> O <sub>6</sub> | 232.23                                         |        |
|                                                | C <sub>7</sub> H <sub>12</sub> O <sub>3</sub>    | 144.17           |                                                | C <sub>10</sub> H <sub>16</sub> O <sub>7</sub> | 248.23                                         |        |
|                                                | C <sub>7</sub> H <sub>12</sub> O <sub>4</sub>    | 160.17           |                                                | C <sub>10</sub> H <sub>20</sub> O <sub>6</sub> | 236.26                                         |        |
|                                                | C <sub>8</sub> H <sub>12</sub> O <sub>4</sub>    | 172.18           |                                                | C <sub>10</sub> H <sub>22</sub> O <sub>4</sub> | 206.28                                         |        |
|                                                | C <sub>9</sub> H <sub>14</sub> O <sub>3</sub>    | 170.21           |                                                | C <sub>10</sub> H <sub>22</sub> O <sub>5</sub> | 222.28                                         |        |
|                                                | C <sub>10</sub> H <sub>16</sub> O <sub>3</sub>   | 184.23           |                                                | C <sub>13</sub> H <sub>28</sub> O <sub>6</sub> | 280.36                                         |        |
|                                                | C <sub>9</sub> H <sub>16</sub> O <sub>4</sub>    | 188.22           |                                                | C <sub>7</sub> H <sub>10</sub> O <sub>6</sub>  | 190.15                                         |        |
|                                                | C <sub>10</sub> H <sub>16</sub> O <sub>4</sub>   | 200.23           |                                                | C <sub>7</sub> H <sub>12</sub> O <sub>5</sub>  | 176.17                                         |        |
|                                                | C <sub>10</sub> H <sub>18</sub> O <sub>4</sub>   | 202.25           |                                                | C <sub>8</sub> H <sub>12</sub> O <sub>5</sub>  | 188.18                                         |        |
|                                                | C <sub>10</sub> H <sub>20</sub> O <sub>3</sub>   | 188.26           |                                                | C <sub>8</sub> H <sub>12</sub> O <sub>6</sub>  | 204.18                                         |        |
|                                                | C <sub>10</sub> H <sub>22</sub> O <sub>3</sub>   | 190.28           |                                                | C <sub>8</sub> H <sub>12</sub> O <sub>7</sub>  | 220.18                                         |        |
|                                                | C <sub>9</sub> H <sub>14</sub> O <sub>4</sub>    | 186.20           |                                                | C <sub>9</sub> H <sub>14</sub> O <sub>5</sub>  | 202.20                                         |        |
|                                                | C <sub>9</sub> H <sub>16</sub> O <sub>5</sub>    | 204.22           |                                                | C <sub>9</sub> H <sub>14</sub> O <sub>6</sub>  | 218.20                                         |        |
|                                                | C <sub>10</sub> H <sub>18</sub> O <sub>5</sub>   | 218.25           |                                                | C <sub>10</sub> H <sub>16</sub> O <sub>5</sub> | 216.23                                         |        |
|                                                | C <sub>7</sub> H <sub>14</sub> O <sub>4</sub>    | 162.18           |                                                | C <sub>13</sub> H <sub>28</sub> O <sub>5</sub> | 264.36                                         |        |
|                                                | C <sub>10</sub> H <sub>18</sub> O <sub>3</sub>   | 186.25           |                                                | C <sub>7</sub> H <sub>10</sub> O <sub>5</sub>  | 174.15                                         |        |
|                                                | C <sub>9</sub> H <sub>16</sub> O <sub>6</sub>    | 220.22           |                                                | C <sub>9</sub> H <sub>14</sub> O <sub>7</sub>  | 234.20                                         |        |
|                                                | C <sub>10</sub> H <sub>20</sub> O <sub>4</sub>   | 204.26           |                                                | C <sub>10</sub> H <sub>14</sub> O <sub>5</sub> | 214.21                                         |        |
|                                                | C <sub>10</sub> H <sub>20</sub> O <sub>5</sub>   | 220.26           |                                                | C <sub>10</sub> H <sub>14</sub> O <sub>6</sub> | 230.21                                         |        |
|                                                | C <sub>13</sub> H <sub>26</sub> O <sub>5</sub>   | 262.34           |                                                | C <sub>10</sub> H <sub>18</sub> O <sub>6</sub> | 234.25                                         |        |
|                                                | C <sub>13</sub> H <sub>26</sub> O <sub>4</sub>   | 246.34           |                                                | C <sub>10</sub> H <sub>18</sub> O <sub>7</sub> | 250.25                                         |        |
|                                                | C <sub>13</sub> H <sub>28</sub> O <sub>4</sub>   | 248.36           |                                                | <b>Yellow</b>                                  | C <sub>20</sub> H <sub>42</sub> O <sub>5</sub> | 362.54 |
|                                                | C <sub>14</sub> H <sub>20</sub> O <sub>3</sub>   | 236.31           |                                                |                                                | C <sub>21</sub> H <sub>44</sub> O <sub>5</sub> | 376.58 |
| <b>Red</b>                                     | C <sub>22</sub> H <sub>40</sub> O <sub>8</sub>   | 432.55           | C <sub>22</sub> H <sub>46</sub> O <sub>5</sub> |                                                | 390.60                                         |        |
|                                                | C <sub>21</sub> H <sub>36</sub> N <sub>2</sub> O | 332.52           | C <sub>22</sub> H <sub>46</sub> O <sub>6</sub> |                                                | 406.60                                         |        |
|                                                | C <sub>20</sub> H <sub>34</sub> N <sub>2</sub>   | 302.50           |                                                |                                                |                                                |        |
|                                                | C <sub>19</sub> H <sub>40</sub> O <sub>4</sub>   | 332.52           |                                                |                                                |                                                |        |
|                                                | C <sub>16</sub> H <sub>34</sub> O <sub>3</sub>   | 274.44           |                                                |                                                |                                                |        |
|                                                | C <sub>17</sub> H <sub>36</sub> O <sub>3</sub>   | 288.47           |                                                |                                                |                                                |        |
|                                                | C <sub>18</sub> H <sub>38</sub> O <sub>3</sub>   | 302.49           |                                                |                                                |                                                |        |
|                                                | C <sub>18</sub> H <sub>38</sub> O <sub>4</sub>   | 318.49           |                                                |                                                |                                                |        |
| C <sub>19</sub> H <sub>32</sub> O <sub>8</sub> | 388.45                                           |                  |                                                |                                                |                                                |        |

213

214 **Table S2.** Compounds categorized based on DBE and X<sub>C</sub>. The structural formula and potential  
 215 functional groups of each compound are acquired from the National Library of Medicine.

| DBE Value     | X <sub>C</sub> Value | Classification             | Compounds Series                                                                                                                                                | DBE Value      | X <sub>C</sub> Value | Classification                                               | Compounds Series                                                                                                                                                               |
|---------------|----------------------|----------------------------|-----------------------------------------------------------------------------------------------------------------------------------------------------------------|----------------|----------------------|--------------------------------------------------------------|--------------------------------------------------------------------------------------------------------------------------------------------------------------------------------|
| CHO Compounds |                      |                            |                                                                                                                                                                 | CHON Compounds |                      |                                                              |                                                                                                                                                                                |
| 0             | /                    | Saturated alcohol or ether | C <sub>10</sub> H <sub>22</sub> O <sub>5</sub> (CH <sub>2</sub> ) <sub>n</sub><br>C <sub>9</sub> H <sub>20</sub> O <sub>4</sub> (CH <sub>2</sub> ) <sub>n</sub> | 0              | 0                    | Alcohols or ether compounds containing multiple amino groups | C <sub>6</sub> H <sub>18</sub> N <sub>4</sub> O(CH <sub>2</sub> ) <sub>n</sub><br>C <sub>8</sub> H <sub>21</sub> N <sub>3</sub> O <sub>2</sub> (CH <sub>2</sub> ) <sub>n</sub> |

| DBE Value | X <sub>C</sub> Value | Classification                                                                         | Compounds Series                                                               | DBE Value | X <sub>C</sub> Value | Classification                                                                                                                                            | Compounds Series                                                                              |
|-----------|----------------------|----------------------------------------------------------------------------------------|--------------------------------------------------------------------------------|-----------|----------------------|-----------------------------------------------------------------------------------------------------------------------------------------------------------|-----------------------------------------------------------------------------------------------|
|           |                      |                                                                                        | C <sub>8</sub> H <sub>18</sub> O <sub>3</sub> (CH <sub>2</sub> ) <sub>n</sub>  |           |                      |                                                                                                                                                           | C <sub>7</sub> H <sub>20</sub> N <sub>4</sub> O <sub>2</sub> (CH <sub>2</sub> ) <sub>n</sub>  |
|           |                      |                                                                                        | C <sub>11</sub> H <sub>24</sub> O <sub>2</sub> (CH <sub>2</sub> ) <sub>n</sub> |           |                      |                                                                                                                                                           | C <sub>9</sub> H <sub>21</sub> NO <sub>3</sub> (CH <sub>2</sub> ) <sub>n</sub>                |
|           |                      |                                                                                        | C <sub>10</sub> H <sub>22</sub> O(CH <sub>2</sub> ) <sub>n</sub>               |           |                      |                                                                                                                                                           | C <sub>9</sub> H <sub>22</sub> N <sub>2</sub> O <sub>4</sub> (CH <sub>2</sub> ) <sub>n</sub>  |
| 1         |                      | Aliphatic compounds with one unsaturated bond                                          | C <sub>9</sub> H <sub>18</sub> O <sub>6</sub> (CH <sub>2</sub> ) <sub>n</sub>  |           |                      |                                                                                                                                                           |                                                                                               |
|           |                      |                                                                                        | C <sub>10</sub> H <sub>20</sub> O <sub>3</sub> (CH <sub>2</sub> ) <sub>n</sub> |           |                      |                                                                                                                                                           |                                                                                               |
|           |                      |                                                                                        | C <sub>9</sub> H <sub>18</sub> O <sub>2</sub> (CH <sub>2</sub> ) <sub>n</sub>  |           |                      |                                                                                                                                                           |                                                                                               |
|           |                      |                                                                                        | C <sub>8</sub> H <sub>14</sub> O <sub>3</sub> (CH <sub>2</sub> ) <sub>n</sub>  | 1         |                      | Compounds with an unsaturated bond or ring                                                                                                                | C <sub>8</sub> H <sub>18</sub> N <sub>2</sub> O(CH <sub>2</sub> ) <sub>n</sub>                |
| 2         |                      |                                                                                        | C <sub>11</sub> H <sub>20</sub> O <sub>7</sub> (CH <sub>2</sub> ) <sub>n</sub> |           |                      |                                                                                                                                                           | C <sub>10</sub> H <sub>22</sub> N <sub>2</sub> O <sub>2</sub> (CH <sub>2</sub> ) <sub>n</sub> |
|           |                      |                                                                                        | C <sub>7</sub> H <sub>12</sub> O <sub>6</sub> (CH <sub>2</sub> ) <sub>n</sub>  |           |                      |                                                                                                                                                           | C <sub>7</sub> H <sub>17</sub> N <sub>3</sub> O <sub>3</sub> (CH <sub>2</sub> ) <sub>n</sub>  |
|           |                      |                                                                                        | C <sub>6</sub> H <sub>10</sub> O <sub>5</sub> (CH <sub>2</sub> ) <sub>n</sub>  |           |                      |                                                                                                                                                           | C <sub>7</sub> H <sub>16</sub> N <sub>2</sub> O <sub>4</sub> (CH <sub>2</sub> ) <sub>n</sub>  |
|           |                      |                                                                                        | C <sub>8</sub> H <sub>14</sub> O <sub>7</sub> (CH <sub>2</sub> ) <sub>n</sub>  | 2         |                      | Unsaturated aliphatic compounds containing one or more nitro/nitroso/imino/amino, carbonyl/carboxyl/hydroxyl/ether bonds                                  | C <sub>6</sub> H <sub>12</sub> N <sub>2</sub> O <sub>4</sub> (CH <sub>2</sub> ) <sub>n</sub>  |
|           |                      |                                                                                        | C <sub>9</sub> H <sub>16</sub> O <sub>4</sub> (CH <sub>2</sub> ) <sub>n</sub>  |           |                      |                                                                                                                                                           | C <sub>6</sub> H <sub>12</sub> N <sub>2</sub> O <sub>5</sub> (CH <sub>2</sub> ) <sub>n</sub>  |
| 3         | 0                    | Organic acid or organic alcohol with C=C/carboxyl/ester groups                         | C <sub>6</sub> H <sub>8</sub> O <sub>7</sub> (CH <sub>2</sub> ) <sub>n</sub>   |           |                      |                                                                                                                                                           | C <sub>7</sub> H <sub>14</sub> N <sub>2</sub> O <sub>6</sub> (CH <sub>2</sub> ) <sub>n</sub>  |
|           |                      |                                                                                        | C <sub>6</sub> H <sub>8</sub> O <sub>6</sub> (CH <sub>2</sub> ) <sub>n</sub>   | 3         |                      |                                                                                                                                                           | C <sub>5</sub> H <sub>8</sub> N <sub>2</sub> O <sub>5</sub> (CH <sub>2</sub> ) <sub>n</sub>   |
|           |                      |                                                                                        | C <sub>8</sub> H <sub>12</sub> O <sub>5</sub> (CH <sub>2</sub> ) <sub>n</sub>  |           |                      |                                                                                                                                                           | C <sub>5</sub> H <sub>8</sub> N <sub>2</sub> O <sub>6</sub> (CH <sub>2</sub> ) <sub>n</sub>   |
|           |                      |                                                                                        | C <sub>15</sub> H <sub>24</sub> O <sub>9</sub> (CH <sub>2</sub> ) <sub>n</sub> |           |                      | Unsaturated compounds containing multiple nitro and amide groups                                                                                          | C <sub>6</sub> H <sub>10</sub> N <sub>2</sub> O <sub>7</sub> (CH <sub>2</sub> ) <sub>n</sub>  |
| 4         |                      |                                                                                        | C <sub>6</sub> H <sub>6</sub> O <sub>8</sub> (CH <sub>2</sub> ) <sub>n</sub>   | 4         |                      | Unsaturated compounds containing multiple amino and ester/carbonyl groups                                                                                 | C <sub>3</sub> H <sub>4</sub> N <sub>4</sub> O <sub>5</sub> (CH <sub>2</sub> ) <sub>n</sub>   |
|           |                      |                                                                                        |                                                                                |           |                      | Unsaturated compounds containing multiple amino groups                                                                                                    | C <sub>5</sub> H <sub>6</sub> N <sub>2</sub> O <sub>7</sub> (CH <sub>2</sub> ) <sub>n</sub>   |
| 5         |                      |                                                                                        | C <sub>8</sub> H <sub>8</sub> O <sub>10</sub> (CH <sub>2</sub> ) <sub>n</sub>  | 1         |                      | Unsaturated aliphatic compounds or cyclic compounds with multiple nitro/nitroso/imino/amino groups, carbonyl/ester/carboxyl/hydroxyl groups               | C <sub>7</sub> H <sub>18</sub> N <sub>4</sub> (CH <sub>2</sub> ) <sub>n</sub>                 |
|           |                      |                                                                                        |                                                                                |           |                      | Compounds with an unsaturated bond or ring                                                                                                                | C <sub>8</sub> H <sub>17</sub> NO <sub>4</sub> (CH <sub>2</sub> ) <sub>n</sub>                |
| 1         | 1                    | Formulas with one equivalent double bond/circle and several ether bonds/alcohol groups | C <sub>7</sub> H <sub>14</sub> O <sub>4</sub> (CH <sub>2</sub> ) <sub>n</sub>  |           |                      |                                                                                                                                                           | C <sub>4</sub> H <sub>6</sub> N <sub>4</sub> O <sub>6</sub> (CH <sub>2</sub> ) <sub>n</sub>   |
|           |                      |                                                                                        | C <sub>8</sub> H <sub>16</sub> O <sub>5</sub> (CH <sub>2</sub> ) <sub>n</sub>  | 4         |                      |                                                                                                                                                           | C <sub>7</sub> H <sub>8</sub> N <sub>2</sub> O <sub>8</sub> (CH <sub>2</sub> ) <sub>n</sub>   |
| 3         | 1                    | Organic acid or organic alcohol containing circles/C=C/carboxyl/ester groups           | C <sub>7</sub> H <sub>10</sub> O <sub>4</sub> (CH <sub>2</sub> ) <sub>n</sub>  | 5         |                      |                                                                                                                                                           |                                                                                               |
| 4         | 1.667                |                                                                                        | C <sub>6</sub> H <sub>6</sub> O <sub>5</sub> (CH <sub>2</sub> ) <sub>n</sub>   | 3         |                      | Nitrogen heterocyclic compounds such as imidazole, pyrazine and pyrazole, or polycyclic compounds with multiple amino groups. May contain a benzene ring. | C <sub>24</sub> H <sub>46</sub> N <sub>2</sub> (CH <sub>2</sub> ) <sub>n</sub>                |
| 3         | 2.2                  | Aldehydes or alcohols with multiple unsaturated bonds/circles                          | C <sub>18</sub> H <sub>32</sub> O(CH <sub>2</sub> ) <sub>n</sub>               | 4         | 2.333                |                                                                                                                                                           | C <sub>13</sub> H <sub>22</sub> N <sub>2</sub> O(CH <sub>2</sub> ) <sub>n</sub>               |
| 4         | 2.333                | Aromatic compounds or aliphatic unsaturated compounds                                  | C <sub>14</sub> H <sub>22</sub> O <sub>2</sub> (CH <sub>2</sub> ) <sub>n</sub> |           |                      |                                                                                                                                                           | C <sub>14</sub> H <sub>24</sub> N <sub>2</sub> (CH <sub>2</sub> ) <sub>n</sub>                |
| 5         | 2.429                |                                                                                        | C <sub>13</sub> H <sub>18</sub> O <sub>3</sub> (CH <sub>2</sub> ) <sub>n</sub> |           |                      |                                                                                                                                                           | C <sub>11</sub> H <sub>16</sub> N <sub>2</sub> O(CH <sub>2</sub> ) <sub>n</sub>               |
| 4         | 2.5                  | Aldehydes, ethers or alcohols containing multiple unsaturated bonds                    | C <sub>15</sub> H <sub>24</sub> O(CH <sub>2</sub> ) <sub>n</sub>               | 5         | 2.5                  | Aromatic compounds with a ring/unsaturated bonds, polycyclic compounds                                                                                    | C <sub>13</sub> H <sub>20</sub> N <sub>2</sub> O <sub>2</sub> (CH <sub>2</sub> ) <sub>n</sub> |
| 5         | 2.5                  | Aromatic compounds or aliphatic compounds with multiple unsaturated bonds/rings        | C <sub>11</sub> H <sub>14</sub> O(CH <sub>2</sub> ) <sub>n</sub>               | 6         | 2.556                | Aromatic compounds with rings of unsaturated bonds, polycyclic compounds                                                                                  | C <sub>12</sub> H <sub>16</sub> N <sub>2</sub> O <sub>3</sub> (CH <sub>2</sub> ) <sub>n</sub> |



| DBE Value | X <sub>C</sub> Value | Classification                                                                                    | Compounds Series                                                               | DBE Value | X <sub>C</sub> Value                                                                          | Classification                                                                                | Compounds Series                                                                              |                                                                                               |
|-----------|----------------------|---------------------------------------------------------------------------------------------------|--------------------------------------------------------------------------------|-----------|-----------------------------------------------------------------------------------------------|-----------------------------------------------------------------------------------------------|-----------------------------------------------------------------------------------------------|-----------------------------------------------------------------------------------------------|
| 6         | 2.5                  | Aromatic compounds with multiple unsaturated functional groups or steroid compounds               | C <sub>12</sub> H <sub>14</sub> O <sub>4</sub> (CH <sub>2</sub> ) <sub>n</sub> | 5         | 2.6                                                                                           | Aromatic compounds with a ring/ unsaturated bonds, polycyclic compounds                       | C <sub>11</sub> H <sub>16</sub> N <sub>2</sub> (CH <sub>2</sub> ) <sub>n</sub>                |                                                                                               |
| 6         | 2.556                | Aromatic compounds or polycyclic compounds with multiple unsaturated functional groups or circles | C <sub>18</sub> H <sub>26</sub> O <sub>3</sub> (CH <sub>2</sub> ) <sub>n</sub> | 6         |                                                                                               | 2.636                                                                                         | Aromatic compounds with rings or unsaturated bonds, polycyclic compounds                      | C <sub>12</sub> H <sub>17</sub> NO(CH <sub>2</sub> ) <sub>n</sub>                             |
| 6         | 2.6                  |                                                                                                   | C <sub>10</sub> H <sub>10</sub> O <sub>2</sub> (CH <sub>2</sub> ) <sub>n</sub> |           | C <sub>9</sub> H <sub>10</sub> N <sub>2</sub> O(CH <sub>2</sub> ) <sub>n</sub>                |                                                                                               |                                                                                               |                                                                                               |
| 7         | 2.6                  |                                                                                                   | C <sub>12</sub> H <sub>12</sub> O <sub>4</sub> (CH <sub>2</sub> ) <sub>n</sub> |           | C <sub>11</sub> H <sub>13</sub> NO <sub>2</sub> (CH <sub>2</sub> ) <sub>n</sub>               |                                                                                               |                                                                                               |                                                                                               |
| 8         | 2.6                  |                                                                                                   | C <sub>13</sub> H <sub>12</sub> O <sub>6</sub> (CH <sub>2</sub> ) <sub>n</sub> |           | C <sub>10</sub> H <sub>12</sub> N <sub>2</sub> O <sub>2</sub> (CH <sub>2</sub> ) <sub>n</sub> |                                                                                               |                                                                                               |                                                                                               |
| 8         | 2.636                |                                                                                                   | C <sub>13</sub> H <sub>12</sub> O <sub>5</sub> (CH <sub>2</sub> ) <sub>n</sub> | 7         | 2.636                                                                                         | C <sub>11</sub> H <sub>12</sub> N <sub>2</sub> O <sub>4</sub> (CH <sub>2</sub> ) <sub>n</sub> | C <sub>11</sub> H <sub>12</sub> N <sub>2</sub> O <sub>4</sub> (CH <sub>2</sub> ) <sub>n</sub> |                                                                                               |
| 9         | 2.636                |                                                                                                   | C <sub>12</sub> H <sub>8</sub> O <sub>7</sub> (CH <sub>2</sub> ) <sub>n</sub>  | 7         | 2.636                                                                                         | C <sub>9</sub> H <sub>8</sub> N <sub>2</sub> O <sub>3</sub> (CH <sub>2</sub> ) <sub>n</sub>   | C <sub>9</sub> H <sub>8</sub> N <sub>2</sub> O <sub>3</sub> (CH <sub>2</sub> ) <sub>n</sub>   |                                                                                               |
| 10        | 2.667                |                                                                                                   | C <sub>18</sub> H <sub>18</sub> O <sub>8</sub> (CH <sub>2</sub> ) <sub>n</sub> | 8         | 2.667                                                                                         | Nitrogen heterocyclic compounds or aromatic compounds                                         | C <sub>9</sub> H <sub>6</sub> N <sub>2</sub> O <sub>5</sub> (CH <sub>2</sub> ) <sub>n</sub>   |                                                                                               |
| 11        | 2.692                |                                                                                                   | C <sub>17</sub> H <sub>14</sub> O <sub>9</sub> (CH <sub>2</sub> ) <sub>n</sub> | 6         | 2.667                                                                                         |                                                                                               | C <sub>12</sub> H <sub>16</sub> N <sub>2</sub> (CH <sub>2</sub> ) <sub>n</sub>                | C <sub>12</sub> H <sub>16</sub> N <sub>2</sub> (CH <sub>2</sub> ) <sub>n</sub>                |
| 7         | 2.7143               | Polyphenyl ring compounds                                                                         | C <sub>11</sub> H <sub>10</sub> O(CH <sub>2</sub> ) <sub>n</sub>               | 7         | 2.692                                                                                         |                                                                                               | C <sub>8</sub> H <sub>6</sub> N <sub>2</sub> O <sub>2</sub> (CH <sub>2</sub> ) <sub>n</sub>   | C <sub>8</sub> H <sub>6</sub> N <sub>2</sub> O <sub>2</sub> (CH <sub>2</sub> ) <sub>n</sub>   |
| 8         | 2.7143               |                                                                                                   | C <sub>10</sub> H <sub>6</sub> O <sub>2</sub> (CH <sub>2</sub> ) <sub>n</sub>  | 8         |                                                                                               |                                                                                               | C <sub>10</sub> H <sub>8</sub> N <sub>2</sub> O <sub>4</sub> (CH <sub>2</sub> ) <sub>n</sub>  | C <sub>10</sub> H <sub>8</sub> N <sub>2</sub> O <sub>4</sub> (CH <sub>2</sub> ) <sub>n</sub>  |
| 10        | 2.789                |                                                                                                   | C <sub>16</sub> H <sub>14</sub> O(CH <sub>2</sub> ) <sub>n</sub>               | 9         |                                                                                               |                                                                                               | C <sub>18</sub> H <sub>22</sub> N <sub>2</sub> O <sub>6</sub> (CH <sub>2</sub> ) <sub>n</sub> | C <sub>18</sub> H <sub>22</sub> N <sub>2</sub> O <sub>6</sub> (CH <sub>2</sub> ) <sub>n</sub> |
| 11        | 2.8                  |                                                                                                   | C <sub>15</sub> H <sub>10</sub> O <sub>2</sub> (CH <sub>2</sub> ) <sub>n</sub> | 7         |                                                                                               | C <sub>11</sub> H <sub>12</sub> N <sub>2</sub> O(CH <sub>2</sub> ) <sub>n</sub>               | C <sub>11</sub> H <sub>12</sub> N <sub>2</sub> O(CH <sub>2</sub> ) <sub>n</sub>               |                                                                                               |
| 11        | 2.810                |                                                                                                   | C <sub>15</sub> H <sub>10</sub> O(CH <sub>2</sub> ) <sub>n</sub>               | 9         |                                                                                               | C <sub>11</sub> H <sub>8</sub> N <sub>2</sub> O <sub>5</sub> (CH <sub>2</sub> ) <sub>n</sub>  | C <sub>11</sub> H <sub>8</sub> N <sub>2</sub> O <sub>5</sub> (CH <sub>2</sub> ) <sub>n</sub>  |                                                                                               |
|           |                      |                                                                                                   |                                                                                |           |                                                                                               | 10                                                                                            | 2.692                                                                                         | Nitrogen heterocyclic compounds or aromatic compounds. May contain multiple benzene rings.    |
|           |                      |                                                                                                   |                                                                                | 8         | 2.7143                                                                                        | C <sub>10</sub> H <sub>8</sub> N <sub>2</sub> O <sub>2</sub> (CH <sub>2</sub> ) <sub>n</sub>  |                                                                                               |                                                                                               |
|           |                      |                                                                                                   |                                                                                |           | 2.733                                                                                         | C <sub>9</sub> H <sub>6</sub> N <sub>2</sub> O(CH <sub>2</sub> ) <sub>n</sub>                 |                                                                                               |                                                                                               |
|           |                      |                                                                                                   |                                                                                | 11        | 2.818                                                                                         | C <sub>14</sub> H <sub>10</sub> N <sub>2</sub> (CH <sub>2</sub> ) <sub>n</sub>                |                                                                                               |                                                                                               |
|           |                      |                                                                                                   |                                                                                | 12        | 2.818                                                                                         | C <sub>16</sub> H <sub>12</sub> N <sub>2</sub> O <sub>2</sub> (CH <sub>2</sub> ) <sub>n</sub> |                                                                                               |                                                                                               |
|           |                      |                                                                                                   |                                                                                |           | 2.833                                                                                         | C <sub>14</sub> H <sub>8</sub> N <sub>2</sub> (CH <sub>2</sub> ) <sub>n</sub>                 |                                                                                               |                                                                                               |

216

217

218

219

## 220 Reference

- 221 1. J. L. Xu, H. F. Deng, Y. Q. Wang, P. Li, J. Q. Zeng, H. W. Pang, X. Xu, X. Li, Y. Yang and S. Gligorovski,  
222 Heterogeneous chemistry of ozone with floor cleaning agent: Implications of secondary VOCs in  
223 the indoor environment, *Sci. Total Environ.*, 2023, **862**.
- 224 2. M. M. Yassine, M. Harir, E. Dabek-Zlotorzynska and P. Schmitt-Kopplin, Structural characterization  
225 of organic aerosol using Fourier transform ion cyclotron resonance mass spectrometry: aromaticity  
226 equivalent approach, *Rapid Commun. Mass Spectrom.*, 2014, **28**, 2445-2454.
- 227 3. Y. Wan, C. Xing, X. Wang, Z. Yang, X. Huang, X. Ge, L. Du, Q. Wang and H. Yu, Nontarget Tandem  
228 High-Resolution Mass Spectrometry Analysis of Functionalized Organic Compounds in  
229 Atmospherically Relevant Samples, *Environ. Sci. Technol. Lett.*, 2022, **9**, 1022-1029.
- 230 4. W. Yiqun, H. Deng, L. Pan, J. Xu, G. Loisel, H. Pang, X. Xu, X. Li and S. Gligorovski, Interfacial Ozone  
231 Oxidation Chemistry at a Riverine Surface Microlayer as a Source of Nitrogen Organic Compounds,  
232 *Environ. Sci. Technol. Lett.*, 2022, **9**, 493-500.
- 233 5. X. Xu, H. W. Pang, C. Liu, K. Y. Wang, G. Loisel, L. Li, S. Gligorovski and X. Li, Real-time measurements  
234 of product compounds formed through the reaction of ozone with breath exhaled VOCs, *Environ.*  
235 *Sci. Proc. Impacts.*, 2022, **24**, 2237-2248.
- 236 6. W. Wang, Y. H. Zhang, B. Jiang, Y. Y. Chen, Y. Y. Song, Y. T. Tang, C. Dong and Z. W. Cai, Molecular  
237 characterization of organic aerosols in Taiyuan, China: Seasonal variation and source identification,  
238 *Sci. Total Environ.*, 2021, **800**.
- 239 7. J. H. Kroll, N. M. Donahue, J. L. Jimenez, S. H. Kessler, M. R. Canagaratna, K. R. Wilson, K. E. Altieri, L.

- 240 R. Mazzoleni, A. S. Wozniak, H. Bluhm, E. R. Mysak, J. D. Smith, C. E. Kolb and D. R. Worsnop, Carbon  
241 oxidation state as a metric for describing the chemistry of atmospheric organic aerosol, *Nat.*  
242 *Chem.*, 2011, **3**, 133-139.
- 243 8. K. J. Nihill, M. M. Coggon, C. Y. Lim, A. R. Koss, B. Yuan, J. E. Krechmer, K. Sekimoto, J. L. Jimenez, J.  
244 de Gouw, C. D. Cappa, C. L. Heald, C. Warneke and J. H. Kroll, Evolution of organic carbon in the  
245 laboratory oxidation of biomass-burning emissions, *Atmospheric Chem. Phys.*, 2023, **23**, 7887-  
246 7899.
- 247 9. Y. Li, U. Pöschl and M. Shiraiwa, Molecular corridors and parameterizations of volatility in the  
248 chemical evolution of organic aerosols, *Atmos. Chem. Phys.*, 2016, **16**, 3327-3344.
- 249 10. F. Bianchi, T. Kurtén, M. Riva, C. Mohr, M. P. Rissanen, P. Roldin, T. Berndt, J. D. Crouse, P. O.  
250 Wennberg, T. F. Mentel, J. Wildt, H. Junninen, T. Jokinen, M. Kulmala, D. R. Worsnop, J. A.  
251 Thornton, N. Donahue, H. G. Kjaergaard and M. Ehn, Highly Oxygenated Organic Molecules (HOM)  
252 from Gas-Phase Autoxidation Involving Peroxy Radicals: A Key Contributor to Atmospheric Aerosol,  
253 *Chem. Rev.*, 2019, **119**, 3472-3509.
- 254 11. M. Schervish and N. M. Donahue, Peroxy radical chemistry and the volatility basis set, *Atmos. Chem.*  
255 *Phys.*, 2020, **20**, 1183-1199.
- 256 12. K. E. Daumit, S. H. Kessler and J. H. Kroll, Average chemical properties and potential formation  
257 pathways of highly oxidized organic aerosol, *Faraday Discuss.*, 2013, **165**, 181-202.
- 258 13. W. Chen, W. Hu, Z. Tao, Y. Cai, M. Cai, M. Zhu, Y. Ye, H. Zhou, H. Jiang, J. Li, W. Song, J. Zhou, S.  
259 Huang, B. Yuan, M. Shao, Q. Feng, Y. Li, G. Isaacman-VanWertz, H. Stark, D. A. Day, P.  
260 Campuzano-Jost, J. L. Jimenez and X. Wang, Quantitative Characterization of the Volatility  
261 Distribution of Organic Aerosols in a Polluted Urban Area: Intercomparison Between  
262 Thermodenuder and Molecular Measurements, *J. Geophys. Res. Atmos.*, 2024, **129**.
- 263 14. M. Ehn, J. A. Thornton, E. Kleist, M. Sipilä, H. Junninen, I. Pullinen, M. Springer, F. Rubach, R.  
264 Tillmann, B. Lee, F. Lopez-Hilfiker, S. Andres, I. H. Acir, M. Rissanen, T. Jokinen, S. Schobesberger,  
265 J. Kangasluoma, J. Kontkanen, T. Nieminen, T. Kurtén, L. B. Nielsen, S. Jorgensen, H. G. Kjaergaard,  
266 M. Canagaratna, M. Dal Maso, T. Berndt, T. Petäjä, A. Wahner, V. M. Kerminen, M. Kulmala, D. R.  
267 Worsnop, J. Wildt and T. F. Mentel, A large source of low-volatility secondary organic aerosol,  
268 *Nature*, 2014, **506**, 476-+.
- 269
